# Supplementary material for: MAIT Cells Display a Specific Response to Type 1 IFN Underlying the Adjuvant Effect of TLR7/8 Ligands
Source: Front Immunol. 2020 Sep 8;11:2097. doi: 10.3389/fimmu.2020.02097 (PMC7509539; doi:10.3389/fimmu.2020.02097)
Supplement: Supplementary file 1 [file Table_1.XLSX]

## Sheet: Upregulated in MAIT
Fold Change	P-Val	FDR P-Val	Gene symbol
775.42	5.29e-17	3.07e-13	OAS1
716.52	8.17e-15	1.35e-11	IFIT3
715.07	5.73e-17	3.07e-13	IFIT1
383.92	2.9e-14	2.96e-11	IFI44L
383.31	9.42e-17	4.04e-13	LAMP3
318.78	5.48e-14	4.96e-11	CMPK2
259.42	1.92e-16	5.88e-13	USP41
227.17	1.64e-13	1.14e-10	MX1
194.05	1.97e-14	2.53e-11	RSAD2
149.83	6.15e-20	1.32e-15	USP18
131.42	1.71e-16	5.88e-13	IFI6
108.74	6.13e-16	1.51e-12	IFIT2
90.58	1.13e-10	2.93e-08	ETV7
86.59	1.54e-13	1.14e-10	LGALS9
83.29	8.56e-16	1.67e-12	HERC5
71.01	5.46e-11	1.6e-08	MX2
70.03	2.27e-14	2.56e-11	RTP4
67.08	6.69e-16	1.51e-12	HELZ2
62.76	2.45e-17	2.62e-13	OAS3
56.86	7.06e-16	1.51e-12	OASL
49.46	1.56e-11	5.39e-09	ISG15
46.46	1.67e-09	3.07e-07	EPSTI1
32.34	1.99e-15	3.56e-12	SAMD9L
31.6	1.06e-09	2.05e-07	RASGRP3
30.5	2.43e-14	2.6e-11	IRF7
28.66	1.37e-10	3.46e-08	STAT1
28.59	4.95e-13	2.95e-10	PNPT1
25.58	1.64e-14	2.51e-11	IFIH1
25.23	2.1e-12	1.01e-09	TNFSF10
24.2	9.21e-13	5.06e-10	BST2
23.09	5.12e-12	2.15e-09	CCR1
22.5	5.11e-13	2.96e-10	LY6E
22.18	5.55e-14	4.96e-11	HERC6
21.78	1.1e-11	4.01e-09	CSF1
21.65	2e-06	0.0001	PMAIP1
20.49	1.15e-12	6.17e-10	DDX60
20.46	1.43e-10	3.51e-08	GBP1
20.44	4.18e-12	1.8e-09	IFI44
20.14	3.04e-10	6.72e-08	NEXN
20.07	2.6e-13	1.69e-10	LAP3
19.89	7.68e-14	6.1e-11	OAS2
19.57	4.57e-11	1.42e-08	APOL6
19.44	2.11e-14	2.53e-11	IFIT5
18.53	1.29e-11	4.61e-09	PARP9
18.36	9.85e-11	2.61e-08	ZBP1
17.28	1.6e-09	2.96e-07	BATF3
16.87	1.6e-13	1.14e-10	EIF2AK2
16.49	5.18e-11	1.56e-08	DDX60L
16.01	2.43e-09	4.23e-07	XAF1
15.79	6.42e-05	0.0022	DUSP5
15.21	2.54e-10	5.8e-08	CNP
14.91	5e-11	1.53e-08	GBP4
14.83	6.05e-14	5.1e-11	PARP14
14.46	1.64e-13	1.14e-10	MOV10
14.43	2.55e-13	1.69e-10	PML
14.26	1.54e-08	2.01e-06	CHAC1
14.16	1.73e-11	5.8e-09	TRIM22
13.69	1.4e-12	7.34e-10	IFITM3
13.63	0.0021	0.033	FCRL3
13.31	3.73e-14	3.64e-11	NT5C3A
13.16	2.13e-14	2.53e-11	TRIM21
12.8	4.35e-13	2.66e-10	STAT2
12.8	5.85e-11	1.7e-08	PRKD2
12.56	2.02e-11	6.66e-09	HSH2D
12.16	2.2e-12	1.03e-09	IFITM1
11.95	9.47e-09	1.34e-06	IRF9
11.7	3.33e-08	4.01e-06	DHX58
11.55	9.13e-12	3.44e-09	ZNFX1
11.44	6.2e-13	3.5e-10	TRIM25;
11.29	6.43e-11	1.77e-08	SAT1
11.23	3.86e-08	4.58e-06	GREM2
11.13	8.5e-11	2.28e-08	DDX58
11.01	6.19e-14	5.1e-11	SAMD9
10.84	9.05e-09	1.29e-06	IRS1
10.67	5.27e-08	5.92e-06	FNDC3B
10.62	2.05e-11	6.66e-09	FBXO6
10.46	1.01e-07	1.03e-05	MT2A
10.28	5.67e-12	2.29e-09	SPATS2L
10.16	1.86e-07	1.72e-05	CFH
9.93	3.17e-10	6.93e-08	RNF213
9.86	1.21e-09	2.29e-07	CD274
9.83	2.13e-12	1.01e-09	TRIM22
9.71	1.97e-14	2.53e-11	ISG20
9.7	1.53e-12	7.8e-10	PI4K2B
9.52	1.68e-07	1.58e-05	PTMS
9.45	1.18e-08	1.61e-06	GPR155
9.15	3.77e-09	6.36e-07	SMTNL1
8.97	1.91e-09	3.38e-07	TDRD7
8.93	9.79e-09	1.37e-06	SNTB1
8.85	2.51e-08	3.09e-06	PIM1
8.8	2.45e-10	5.66e-08	LGALS9C;
8.79	4.07e-12	1.8e-09	PHF11
8.79	1.21e-10	3.08e-08	CHST12
8.6	1.63e-11	5.54e-09	MVB12A;
8.58	8.37e-08	8.98e-06	SLC38A5
8.51	8.61e-09	1.25e-06	PLSCR1
8.43	1.11e-06	8.15e-05	TLR3
8.38	5.42e-12	2.24e-09	IFI35
8.37	1.02e-10	2.68e-08	C7orf49
8.29	1.6e-09	2.96e-07	TRIM14
8.26	1.29e-06	9.3e-05	MAP3K8
8.15	1.58e-12	7.87e-10	RBCK1
8.09	3.89e-11	1.23e-08	PARP12
8.07	6.65e-09	1e-06	LRP8
7.96	5.22e-06	0.0003	WARS
7.8	7.55e-09	1.11e-06	SAMHD1
7.79	3.87e-12	1.76e-09	C19orf66
7.79	3.35e-06	0.0002	IL12RB2
7.61	2.55e-05	0.0011	IL23R
7.58	6.22e-12	2.42e-09	DTX3L
7.37	1.01e-08	1.39e-06	GBP5
7.37	1.35e-08	1.82e-06	CHST12
7.33	7.27e-07	5.69e-05	LAP3
7.31	5.79e-12	2.3e-09	NMI
7.21	3.48e-13	2.2e-10	SP110
7.19	1.01e-08	1.39e-06	FURIN
7.15	2.52e-09	4.36e-07	DOCK10
7.09	1.06e-11	3.91e-09	DYNLT1
7.07	5.62e-09	8.93e-07	ARHGEF3
6.9	5.3e-11	1.58e-08	TRAFD1
6.84	9.91e-10	1.95e-07	TAP2
6.83	4.67e-09	7.7e-07	CARD17
6.8	6.14e-09	9.56e-07	ECE1
6.76	1.83e-09	3.33e-07	LAG3
6.73	2.22e-11	7.12e-09	UBE2L6
6.51	6.94e-11	1.88e-08	PARP11
6.44	1.21e-08	1.65e-06	CREM
6.27	6.15e-09	9.56e-07	PIM2
6.18	8e-12	3.06e-09	ADAR
6.13	3.84e-07	3.31e-05	flawmawbo;
6.12	1.8e-05	0.0008	SECTM1
6.11	5.23e-09	8.38e-07	TRIM5
6.05	1.92e-08	2.47e-06	PPM1K
5.89	5.25e-08	5.92e-06	APOL2
5.87	2.62e-08	3.21e-06	NLRC5
5.82	1.87e-09	3.34e-07	NUB1
5.81	1.76e-07	1.65e-05	IFITM2
5.79	9.29e-08	9.68e-06	AIM2
5.78	0.0001	0.0036	OR56B1
5.76	1.36e-11	4.77e-09	ZCCHC2
5.75	2.58e-06	0.0002	PGAP1
5.72	0.001	0.0193	SIPA1L2
5.65	4.96e-10	1.05e-07	XRN1
5.52	2.73e-10	6.14e-08	KIAA0040
5.51	0.0007	0.0141	TNFSF13B
5.49	1.99e-09	3.49e-07	CDKL1
5.45	6.03e-07	4.84e-05	APOL1
5.41	2.13e-05	0.0009	FAM46A
5.4	4.19e-12	1.8e-09	MYD88
5.23	0.0001	0.0032	STK3
5.17	2.57e-06	0.0002	MVP;
5.14	8.65e-08	9.19e-06	UNC93B1
5.13	2.31e-08	2.87e-06	IL6ST
5.11	2.65e-06	0.0002	RGS1
5.1	1.2e-05	0.0006	STX11
5.05	1.47e-08	1.95e-06	YEATS2
4.87	3.43e-07	3e-05	FAM122C
4.82	0.0003	0.0083	RASGEF1B
4.8	1.55e-08	2.02e-06	EHD4
4.8	9.86e-08	1.02e-05	MTHFD2
4.79	1.83e-07	1.7e-05	SBNO2
4.77	1.76e-10	4.23e-08	BAG1
4.74	2.71e-05	0.0011	ATF3
4.73	0.0003	0.007	RNF144A
4.66	4.49e-09	7.46e-07	AZI2
4.66	2.25e-06	0.0001	C1GALT1
4.63	1.53e-10	3.73e-08	LPIN2
4.63	1.96e-08	2.5e-06	CD164
4.62	7.55e-07	5.87e-05	FAM84B
4.6	1.13e-08	1.55e-06	NABP1
4.6	2.1e-08	2.65e-06	TRANK1
4.59	1.13e-07	1.13e-05	GPR180
4.58	1.3e-05	0.0006	KAT2A
4.53	2.75e-10	6.14e-08	CHMP5
4.53	3.64e-05	0.0014	HELB
4.49	6.37e-09	9.76e-07	TMEM140
4.47	6.48e-06	0.0003	DENND5A
4.45	0.0025	0.0365	CASP10
4.43	6.44e-11	1.77e-08	SP100
4.43	3.83e-05	0.0014	PLSCR2
4.41	0.0004	0.009	SPATS2L
4.4	2.59e-06	0.0002	CISD3
4.4	0.0003	0.0079	SLAMF7
4.39	8.24e-07	6.31e-05	GCA
4.39	1.54e-06	0.0001	RPS6KA5
4.38	0.0003	0.0079	FASLG
4.37	2.49e-05	0.001	CISH
4.34	1.4e-10	3.5e-08	TMEM229B
4.33	3.92e-08	4.62e-06	GBP3
4.31	1.49e-08	1.96e-06	NAPA
4.29	8e-09	1.17e-06	ARSB
4.24	4.93e-07	4.1e-05	SCLT1
4.23	2.11e-10	4.98e-08	GBP2
4.23	0.0002	0.0056	MNDA
4.23	0.001	0.0193	PRF1
4.22	9.81e-10	1.95e-07	N4BP1
4.18	2.21e-07	1.99e-05	SLFN5
4.16	1.94e-07	1.78e-05	TRIM34
4.14	1.5e-07	1.45e-05	KPNB1
4.14	3.22e-07	2.83e-05	SLC37A1
4.12	4.21e-10	9.04e-08	MASTL
4.12	8.86e-10	1.78e-07	TAP1
4.12	1.74e-06	0.0001	PSME2;
4.11	5.36e-06	0.0003	RAVER2
4.07	0.0009	0.0175	CYP2J2
4.03	5.48e-08	6.12e-06	ANKFY1
4.03	7.54e-06	0.0004	PCYT1A
4.01	5.7e-10	1.2e-07	BAZ1A
4	7.01e-07	5.53e-05	PRDX4
3.96	3.99e-09	6.69e-07	PMF1;
3.95	5.93e-11	1.7e-08	STOM
3.94	1.02e-07	1.03e-05	TTC39B
3.92	2.03e-05	0.0009	HAPLN3
3.92	0.0006	0.0129	NF1
3.91	1.85e-09	3.34e-07	TRIM38
3.9	4.59e-06	0.0003	IL15
3.89	3.06e-06	0.0002	HIVEP1
3.87	1.56e-07	1.49e-05	DNAJA1
3.85	8.92e-06	0.0004	PCGF5
3.83	4.2e-05	0.0016	ZNRF1
3.82	3.69e-07	3.22e-05	GTPBP1
3.82	2.55e-06	0.0002	FLOT1
3.81	2.67e-07	2.38e-05	ACTA2
3.81	0.0011	0.0204	LY96
3.8	6.88e-06	0.0004	TRIM69
3.79	1.01e-07	1.03e-05	HIF1A
3.76	2.55e-07	2.29e-05	UBA7;
3.73	7.83e-08	8.57e-06	ACO1
3.7	1.51e-06	0.0001	PRKAG2
3.69	4.39e-07	3.7e-05	SMCHD1
3.69	1.64e-05	0.0007	BCL2
3.67	5.04e-05	0.0018	SLC1A5
3.65	8.02e-07	6.19e-05	TRIM6-TRIM34
3.63	2.1e-05	0.0009	MTBP
3.62	6.09e-10	1.26e-07	TAF5L
3.62	7.98e-10	1.63e-07	CASP1
3.62	1.14e-07	1.13e-05	OGFR
3.59	4.23e-07	3.58e-05	TIPIN
3.59	2.84e-06	0.0002	HERC6
3.58	4e-07	3.42e-05	STAT3
3.56	9.54e-08	9.88e-06	C5orf56
3.55	0.0028	0.0398	BCL2L14
3.53	1.04e-09	2.04e-07	SP140
3.51	0.0023	0.0345	CASP12
3.5	2.2e-07	1.99e-05	RALB
3.5	8.9e-05	0.0028	PUS7
3.49	7.22e-06	0.0004	NANS
3.48	8.65e-05	0.0028	CD69
3.47	0.0002	0.0058	DPP4
3.46	3.06e-06	0.0002	MAD2L2
3.44	0.0005	0.0101	VAT1
3.44	0.0008	0.0164	REC8
3.42	6.06e-07	4.85e-05	TRIM69
3.42	0.0022	0.0338	SELL
3.4	0.0003	0.0067	TRADD
3.38	1.87e-10	4.47e-08	IFI16
3.38	3.43e-06	0.0002	ADAM19
3.38	5.65e-05	0.002	CCR5
3.36	0.003	0.0423	CHSY1
3.33	7.78e-06	0.0004	FAS
3.32	0.0014	0.0241	CASP7
3.31	7.44e-09	1.1e-06	IDH2
3.31	6.79e-07	5.37e-05	BLM
3.31	1.58e-06	0.0001	LGALS9B
3.3	2.46e-10	5.66e-08	PSMB8
3.3	1.4e-07	1.37e-05	BCL6
3.28	8.84e-09	1.27e-06	PSMB9
3.28	0.0012	0.0212	CMTM8
3.27	3.79e-06	0.0002	MLLT6
3.27	1.99e-05	0.0009	ZNFX1
3.27	2.64e-05	0.0011	SLC7A1
3.24	6.25e-05	0.0021	OPN3
3.23	1.9e-05	0.0008	MYC
3.23	3.13e-05	0.0012	ARHGAP11B;
3.23	4.77e-05	0.0017	NOP16
3.22	1.14e-07	1.13e-05	DTNBP1
3.21	9.96e-05	0.0031	BRCA2
3.2	9.3e-08	9.68e-06	SLC15A3
3.17	8.43e-07	6.43e-05	ARID5A
3.15	8.37e-08	8.98e-06	FAM214A
3.15	4.15e-06	0.0002	MICB
3.13	3.18e-08	3.85e-06	VPS37B
3.12	1.41e-08	1.88e-06	GTPBP2
3.12	1.37e-06	9.72e-05	GCH1
3.11	1.18e-07	1.16e-05	GNG5
3.11	2.85e-05	0.0011	ADAMTSL4
3.1	1.24e-06	9.04e-05	NRSN2-AS1
3.1	0.0002	0.0056	COTL1
3.09	4.12e-06	0.0002	ETV6
3.09	6.57e-05	0.0022	C14orf159
3.08	2.74e-07	2.44e-05	XIAP
3.08	8.86e-06	0.0004	SPTLC2
3.07	6.64e-09	1e-06	CMTR1
3.07	5.51e-07	4.53e-05	WSB2
3.05	1.5e-05	0.0007	OBFC1
3.05	5.57e-05	0.0019	PLEKHA7
3.04	0.0004	0.0094	IRF8
3.03	7.05e-09	1.06e-06	KCNA3
3.03	8.26e-06	0.0004	SLC25A44
3.02	6.89e-06	0.0004	TRIM56
3.02	0.0008	0.016	ADAMTSL4-AS1
3	4.8e-06	0.0003	STX17
3	5.02e-06	0.0003	KDSR
3	4.22e-05	0.0016	P2RX5
2.99	3.37e-08	4.04e-06	RIPK1
2.99	2.72e-05	0.0011	SFMBT2
2.99	5e-05	0.0018	TANK
2.98	8.14e-07	6.26e-05	IRF1
2.98	9.58e-06	0.0005	EMC2
2.93	1.28e-06	9.3e-05	ITGA3
2.93	2.72e-05	0.0011	TMEM106A
2.93	0.0005	0.0115	RERE
2.91	0.0003	0.0081	STX16-NPEPL1
2.9	2.18e-08	2.74e-06	DRAP1
2.9	1.9e-06	0.0001	GIMAP8
2.9	2.51e-05	0.001	LNPEP
2.88	1e-06	7.54e-05	MCOLN2
2.88	0.0001	0.0038	ERAP2
2.88	0.0031	0.0429	STAP1
2.84	5.26e-05	0.0019	ASNS
2.83	6.57e-08	7.27e-06	PSMB8-AS1
2.83	5.54e-07	4.53e-05	LY6E
2.82	2.06e-07	1.88e-05	ME2
2.82	1.48e-05	0.0007	MAP3K14
2.81	2.23e-06	0.0001	SQRDL
2.8	1.4e-05	0.0006	TAF4B
2.79	1.98e-05	0.0009	SOCS2
2.78	7.88e-07	6.1e-05	TMEM126B
2.78	3.17e-06	0.0002	LYSMD2
2.78	1.17e-05	0.0006	SCARB2
2.78	2.15e-05	0.0009	MMD
2.78	2.62e-05	0.0011	GBP6
2.78	6.59e-05	0.0022	GANC
2.76	6.21e-09	9.59e-07	HIVEP2
2.76	1.28e-06	9.3e-05	METTL4
2.75	1.76e-08	2.28e-06	UPP1
2.75	1.07e-05	0.0005	EAF1
2.74	2.77e-09	4.75e-07	NDUFA9
2.73	4.48e-07	3.75e-05	IPCEF1
2.73	1.88e-06	0.0001	ZC3HAV1
2.73	8.8e-06	0.0004	PCYT1A
2.73	2.76e-05	0.0011	C10orf2
2.71	2.13e-06	0.0001	TLE4
2.71	3.49e-05	0.0014	TOP1
2.71	0.0002	0.0046	TMEM62
2.69	1.37e-06	9.72e-05	AFF1
2.69	2.17e-06	0.0001	USP15;
2.68	1.65e-05	0.0007	SLC51A
2.68	0.0005	0.0117	LMNB1
2.66	1.58e-06	0.0001	TMEM185B
2.66	1.51e-05	0.0007	LMO4
2.66	0.0003	0.0071	HDAC4
2.66	0.0013	0.0224	RBM43
2.65	6.12e-06	0.0003	ARL6IP6
2.64	2.36e-05	0.001	RNF157
2.64	0.0008	0.0164	YARS
2.63	0.003	0.0425	YEATS2
2.62	1.37e-06	9.72e-05	CNDP2
2.62	7.94e-05	0.0026	MLKL
2.61	3.44e-06	0.0002	TMEM110-MUSTN1;
2.61	0.0037	0.0489	ELF1
2.6	7.39e-07	5.76e-05	SP140L
2.6	1.8e-06	0.0001	COA6
2.6	0.0004	0.009	RARA
2.58	1e-07	1.03e-05	MRPL17
2.58	6.28e-06	0.0003	PAIP1
2.58	7.77e-06	0.0004	SYTL3
2.58	0.0006	0.0131	SEH1L
2.57	0.0002	0.0056	PTPN2
2.57	0.0002	0.0056	GSDMD
2.56	4.77e-08	5.48e-06	MAML2
2.55	7.62e-05	0.0025	LINS1
2.54	7.37e-06	0.0004	RNF31
2.54	8.78e-06	0.0004	APOO
2.54	1.67e-05	0.0007	L3MBTL3
2.54	1.77e-05	0.0008	PRKCE
2.54	0.001	0.0183	ZNF775
2.54	0.0011	0.0194	GEMIN8
2.52	1.85e-07	1.71e-05	IRF2
2.52	8.52e-06	0.0004	DPP4
2.51	9.27e-08	9.68e-06	CBX7
2.51	0.0001	0.0032	NADK
2.51	0.0002	0.0045	BYSL
2.51	0.0032	0.0437	MFHAS1
2.49	0.0014	0.0236	OR52N4
2.48	6.55e-06	0.0003	CLUAP1
2.48	5.88e-05	0.002	QKI
2.48	0.0013	0.0233	PTPN2
2.48	0.0034	0.0462	LIPA
2.47	3.57e-06	0.0002	NRDC;
2.47	0.0002	0.0049	RAB27A
2.47	0.0005	0.0103	ZNF267
2.45	0.0002	0.0046	AKAP2
2.45	0.0002	0.0062	ICAM2
2.44	0.0001	0.0032	C1orf61
2.43	1.43e-07	1.39e-05	CTSS
2.43	3.83e-06	0.0002	USP42
2.43	4.09e-05	0.0015	TYMP;
2.43	0.0001	0.0042	NOD1
2.43	0.001	0.0185	DYNLT3
2.42	0.0005	0.0102	IRAK4
2.41	2.2e-07	1.99e-05	CASP4
2.41	3.65e-06	0.0002	SNX6
2.4	1.07e-05	0.0005	HEXDC
2.4	7.51e-05	0.0025	CLIP1
2.38	2.37e-05	0.001	NARS
2.38	5.08e-05	0.0018	ZNF107;
2.37	0.0008	0.0158	MARS;
2.36	1.07e-07	1.08e-05	CARD16
2.36	1.31e-06	9.44e-05	ATP5S
2.36	0.001	0.019	CD68
2.36	0.0035	0.047	ARHGAP17
2.35	3.6e-06	0.0002	CCND2
2.35	6.19e-06	0.0003	APOL3
2.34	2.01e-05	0.0009	RASGRP1
2.33	0.0001	0.0035	ITIH4
2.33	0.001	0.0192	UBA7
2.33	0.0025	0.0366	KDELC2
2.31	1.98e-06	0.0001	PSMB10
2.31	1.04e-05	0.0005	SLFN12L
2.31	2.64e-05	0.0011	NDUFV2
2.31	0.0001	0.0038	GPR171
2.3	0.0005	0.0108	CTTNBP2NL
2.29	8.99e-05	0.0029	NUDCD1
2.29	9.26e-05	0.0029	SNAPC1
2.29	0.0003	0.0071	MAK16
2.29	0.0004	0.0094	TSPAN17
2.29	0.0013	0.0222	THOC6
2.28	0.0001	0.0043	CCDC146
2.28	0.0025	0.0365	ACOT9
2.27	0.0004	0.0085	IFRD2
2.26	3.83e-05	0.0014	ZNF672
2.26	0.0001	0.004	BAK1
2.26	0.0007	0.0147	TM9SF1
2.25	1.1e-06	8.15e-05	CD47
2.25	5.57e-06	0.0003	GIMAP4
2.24	3.26e-06	0.0002	FMR1
2.24	0.0001	0.0033	H3F3C
2.24	0.0012	0.0212	VAMP4
2.23	2.1e-05	0.0009	NFKBIZ
2.23	2.9e-05	0.0012	SLC25A28
2.22	1.37e-05	0.0006	SSBP1
2.22	2.31e-05	0.001	H3F3B
2.22	5.85e-05	0.002	TIA1
2.22	0.0003	0.0072	PDE4B
2.21	3.91e-05	0.0015	DBF4B
2.21	0.0004	0.0092	TNK2
2.2	1.06e-05	0.0005	PSMA6
2.19	1.83e-06	0.0001	MORC3
2.19	7.05e-06	0.0004	DDX21
2.18	1.2e-05	0.0006	PSMA4
2.18	4.36e-05	0.0016	SIDT1
2.18	0.0003	0.0078	SBK1
2.18	0.0012	0.0218	SLC6A9
2.17	0.0003	0.0067	IARS
2.17	0.0003	0.0071	PAICS
2.17	0.0003	0.0076	GADD45GIP1
2.17	0.0024	0.0356	ARID3B
2.16	1.52e-05	0.0007	NFATC2
2.16	2.13e-05	0.0009	PSMA3
2.16	0.001	0.0186	CBWD1
2.16	0.0036	0.0476	ABCB10
2.15	0.0001	0.0033	ANXA2R
2.14	7.6e-05	0.0025	TUBA8
2.14	0.0008	0.0164	IL2RB
2.13	1.83e-05	0.0008	GPATCH4
2.13	0.0012	0.0212	MAD2L1BP
2.13	0.0016	0.0258	TARS
2.13	0.0026	0.0382	TMEM200A
2.12	0.0013	0.0229	SENP8
2.12	0.0036	0.0476	SLFN13
2.11	1.03e-05	0.0005	LNPEP
2.11	0.0001	0.0036	RALA
2.11	0.0012	0.0213	ABCA1
2.11	0.0029	0.0407	KNOP1
2.1	1.06e-05	0.0005	ODF2L
2.1	0.0003	0.0072	EFR3A
2.09	5.08e-06	0.0003	FCHSD2
2.09	4.59e-05	0.0017	LUZP1
2.09	6.26e-05	0.0021	HMHB1
2.09	6.29e-05	0.0021	GIMAP2
2.08	1.06e-06	7.86e-05	TINF2
2.08	9.83e-06	0.0005	USPL1
2.08	0.0004	0.0089	TRAPPC9
2.08	0.0008	0.016	HCCS
2.07	1.55e-07	1.49e-05	ELF1
2.07	3.38e-06	0.0002	HM13;
2.06	0.0015	0.0248	FAM71D
2.06	0.0033	0.0448	CCDC86
2.05	4.85e-05	0.0018	DNPEP
2.05	0.0001	0.0036	GTF2E2
2.05	0.0002	0.0064	IL15RA
2.05	0.0004	0.0085	SSBP4
2.05	0.003	0.0425	ARHGAP5
2.04	3.03e-05	0.0012	C17orf62
2.04	0.0004	0.0094	VAMP5
2.03	6.23e-05	0.0021	CBWD6;
2.03	0.0002	0.0059	ARHGAP17
2.03	0.0022	0.0338	MARCH5
2.02	2.05e-06	0.0001	GIMAP7
2.02	3.24e-06	0.0002	ATR
2.02	5.32e-05	0.0019	GARS
2.02	7.68e-05	0.0025	ACSL5
2.02	0.0001	0.0036	KBTBD2
2.02	0.0006	0.0126	LGALS8
2.02	0.0012	0.0213	ZC3H4
2.01	3.89e-07	3.34e-05	MCL1
2.01	1.24e-05	0.0006	CD48
2	0.0001	0.0034	SH3GLB1
2	0.0002	0.0049	SNRPD1
2	0.0005	0.0112	RPIA
2	0.0005	0.0117	CASP5
2	0.0021	0.0328	MMAA

## Sheet: Downregulated in MAIT
Fold Change	P-Val	FDR P-Val	Gene symbol
-14.65	6.37e-11	1.77e-08	RORC
-9.41	0.0002	0.0061	CYP4F22
-8.94	5.11e-08	5.8e-06	PTCH1
-8.9	2.98e-09	5.08e-07	RASSF2
-7.83	3e-08	3.66e-06	SPECC1L-ADORA2A
-7.82	6.13e-09	9.56e-07	DUSP2
-7.81	2.88e-06	0.0002	VSIG1
-7.59	4.38e-08	5.08e-06	TGFBR3
-7.49	7.41e-09	1.1e-06	RNF125
-7.43	3.78e-07	3.28e-05	FAM43A
-7.42	3.57e-08	4.25e-06	THRA
-7.04	1.06e-07	1.06e-05	IFFO2
-6.98	9.3e-09	1.32e-06	CNN2
-6.95	5.99e-10	1.25e-07	KIT
-6.72	1.99e-08	2.52e-06	TTYH3
-6.55	1.66e-05	0.0007	SIT1
-6.18	1.08e-09	2.06e-07	PLEKHF1
-6.13	0.0002	0.0044	CD82
-6.03	0.0007	0.0138	S1PR5
-5.81	1.88e-06	0.0001	LAIR1
-5.78	0.0025	0.037	SPTBN1
-5.53	3.11e-06	0.0002	LAIR2
-5.51	3.67e-10	7.96e-08	NOL4L
-5.46	3.56e-06	0.0002	PTGDR
-5.42	8.56e-10	1.73e-07	KDM2B
-5.34	1.62e-07	1.53e-05	SFXN3
-5.26	7.08e-07	5.56e-05	ARRB1
-5.18	5.22e-09	8.38e-07	FAM117B
-5.18	4.3e-08	5.01e-06	PIK3IP1
-5.1	4.96e-05	0.0018	TMEM204
-5.06	5.72e-07	4.61e-05	LIMK1
-5.05	5.11e-09	8.37e-07	TSC22D3
-5.05	8.03e-08	8.74e-06	PLXND1
-5.05	5.23e-06	0.0003	LDLRAP1
-4.98	0.0002	0.0064	IGFLR1
-4.95	7.78e-06	0.0004	CD27
-4.93	4.63e-08	5.34e-06	IL16
-4.87	1.43e-06	0.0001	FBXO32
-4.84	1.4e-07	1.37e-05	LIMK1
-4.8	1.15e-06	8.43e-05	RGCC
-4.75	0.0002	0.0046	TUBA4A
-4.63	4.18e-07	3.56e-05	SEPT9
-4.6	5.72e-06	0.0003	RGS2
-4.52	1.55e-06	0.0001	SLFN14
-4.49	6.28e-05	0.0021	CARD19
-4.45	5.17e-09	8.38e-07	CNNM2
-4.35	4.51e-07	3.76e-05	SLC27A3
-4.28	3.1e-07	2.74e-05	PDK2
-4.28	1.41e-06	9.92e-05	RPS6KA1
-4.23	1.25e-09	2.35e-07	AMPD3
-4.23	9.37e-06	0.0005	IL17RE
-4.2	4.28e-07	3.62e-05	HLA-DMB
-4.2	2.23e-05	0.0009	CALHM2
-4.15	3.81e-07	3.29e-05	STARD5
-4.14	1.26e-05	0.0006	MICAL1
-4.12	1.93e-06	0.0001	PSD4
-4.05	1.55e-06	0.0001	RPS6KA1
-4.04	5.42e-05	0.0019	MAPRE2
-4.01	3.53e-06	0.0002	AGFG2
-3.98	0.0013	0.022	PRKCA
-3.96	2.67e-06	0.0002	CLSTN3
-3.91	2.64e-06	0.0002	LCK
-3.9	4.43e-06	0.0003	CCNG2
-3.89	9.13e-07	6.92e-05	EHMT2
-3.89	3.99e-06	0.0002	CXCR3
-3.88	8.12e-08	8.8e-06	LBH
-3.85	1.98e-05	0.0009	RARG
-3.84	0.0015	0.0249	CD244
-3.83	5.87e-06	0.0003	PLEKHG3
-3.83	0.0003	0.0078	THBS1
-3.81	1.41e-05	0.0007	ADGRG5
-3.77	3.15e-06	0.0002	RPS6KA1
-3.77	0.0004	0.0089	PTPN22
-3.74	0.0015	0.0251	MPP7
-3.73	1.79e-06	0.0001	LDLRAD4
-3.72	0.001	0.0193	GPCPD1
-3.7	5.65e-05	0.002	SFXN5
-3.69	9.25e-08	9.68e-06	ESYT1
-3.67	1.98e-05	0.0009	PTPRJ
-3.65	1.6e-07	1.52e-05	TGFB1
-3.65	5.74e-06	0.0003	DHRS3;
-3.64	0.0003	0.0078	TP53I11
-3.62	5e-06	0.0003	SMAD3
-3.6	4.26e-05	0.0016	TBC1D10C
-3.6	4.64e-05	0.0017	PDE7A
-3.57	1.42e-06	0.0001	CYB5A
-3.55	1.03e-06	7.66e-05	CCDC64
-3.55	0.0013	0.023	CDK5R1
-3.5	0.0011	0.0201	TTC9
-3.48	0.0004	0.0086	KDM6B
-3.46	4.94e-08	5.64e-06	NT5DC2
-3.45	1.03e-05	0.0005	EPHA4
-3.43	1.38e-08	1.85e-06	RGS14
-3.43	2.33e-05	0.001	LRRC8D
-3.41	6.05e-08	6.72e-06	ZBTB25
-3.41	1.61e-05	0.0007	DHRS13
-3.39	1.04e-06	7.75e-05	RASSF2
-3.38	0.0001	0.0036	NLRC3
-3.35	3.9e-06	0.0002	ITGB7
-3.35	2.76e-05	0.0011	ERMP1
-3.35	0.0007	0.0148	LRMP
-3.29	9.48e-05	0.003	CNPY4
-3.28	2.71e-05	0.0011	KLHL21
-3.27	0.0001	0.0036	MXD4;
-3.26	5.61e-06	0.0003	HIST1H2AG
-3.26	0.0008	0.016	ATXN7L1
-3.22	1.28e-05	0.0006	ARHGEF1
-3.21	1.64e-07	1.55e-05	SUN2
-3.21	1.32e-06	9.46e-05	TRAF3IP3
-3.19	0.0001	0.0034	SNX30
-3.19	0.0003	0.0078	TRAF1
-3.18	0.0003	0.0082	SIPA1
-3.17	7.01e-08	7.71e-06	CCM2
-3.17	1.9e-05	0.0008	EML1
-3.17	5.33e-05	0.0019	TCF7
-3.16	6.24e-07	4.98e-05	RGS10
-3.15	0.0002	0.0047	OSBPL7
-3.13	6.87e-06	0.0004	CDC14B
-3.12	4.36e-06	0.0003	LPCAT1
-3.12	0.0016	0.026	SAMD1
-3.11	8.27e-06	0.0004	MKNK2
-3.11	0.0024	0.0355	PLEC
-3.09	9.19e-05	0.0029	MGEA5
-3.08	9.05e-05	0.0029	RASGEF1A
-3.06	9.59e-06	0.0005	OLFM2
-3.06	0.0027	0.0389	TCAIM
-3.05	1.75e-05	0.0008	GLCCI1
-3.05	0.0013	0.0224	VASH1
-3.03	0.0019	0.0296	TNFRSF1B;
-3.02	3.11e-05	0.0012	YPEL3
-3.01	4.98e-07	4.12e-05	UCP2
-3.01	0.0002	0.0045	MAP3K4
-3	2.25e-05	0.0009	SPN
-3	0.0002	0.0064	PCYOX1
-3	0.0019	0.0304	COLGALT2
-2.99	6.61e-05	0.0022	PVRL1
-2.98	5.1e-06	0.0003	GMCL1
-2.98	0.0001	0.0032	SH2D3C
-2.98	0.0002	0.0061	ATG9A
-2.96	4.11e-08	4.81e-06	ZBTB1
-2.95	8.47e-08	9.04e-06	RPS6KA1
-2.95	5.15e-06	0.0003	TCP11L2
-2.94	0.0004	0.0086	AKTIP
-2.93	8.3e-06	0.0004	CCDC125
-2.93	0.0015	0.0244	TLE1
-2.92	7.13e-06	0.0004	RNF166
-2.91	9.26e-05	0.0029	KLRG1
-2.9	9.49e-07	7.17e-05	TMEM71
-2.9	6.09e-06	0.0003	MOB3A
-2.9	0.0007	0.0145	LINC00612
-2.89	7.04e-05	0.0023	MXI1
-2.89	0.0001	0.0035	GRAMD1A
-2.88	1.12e-06	8.23e-05	KCNAB2
-2.88	1.13e-05	0.0005	AGAP1
-2.87	5.27e-06	0.0003	S100A4
-2.87	0.0008	0.0155	RGL2
-2.87	0.0009	0.0179	TRAM2
-2.85	5.38e-07	4.44e-05	TNRC6C
-2.85	1.67e-05	0.0007	TDRKH
-2.84	3.15e-07	2.78e-05	FYN
-2.84	1.75e-05	0.0008	CD5
-2.83	2.23e-06	0.0001	SLC9A3R1;
-2.82	2.2e-08	2.74e-06	RPS6KA1
-2.81	5.61e-05	0.002	ANKRD23
-2.81	0.001	0.0184	ZNF780A
-2.81	0.0031	0.0429	FRMPD3
-2.8	1.84e-05	0.0008	CTSD
-2.79	1.56e-06	0.0001	DBP
-2.79	5.92e-06	0.0003	ZNF318
-2.79	1.26e-05	0.0006	DNMT3A
-2.79	1.89e-05	0.0008	SNAI3
-2.79	7.87e-05	0.0026	RALGDS
-2.79	0.0002	0.0063	CKAP2
-2.78	6.44e-07	5.12e-05	CD3G
-2.78	5.73e-05	0.002	DAGLB
-2.77	8.72e-06	0.0004	SEMA4C
-2.77	2.36e-05	0.001	SMPD1
-2.77	0.0014	0.0236	FAM53B
-2.76	5.59e-07	4.56e-05	CPNE7
-2.76	0.0012	0.0212	RBMS1
-2.74	0.0002	0.0061	OGFRL1
-2.73	3.38e-06	0.0002	LPAR5
-2.72	4.65e-05	0.0017	ITM2C
-2.72	5.48e-05	0.0019	CAT
-2.71	6.61e-05	0.0022	CCDC112
-2.71	6.75e-05	0.0023	CMTM1
-2.71	0.0002	0.0064	NPRL2
-2.69	0.0007	0.0143	TPP2
-2.68	0.0004	0.0085	TSPAN14
-2.67	0.0003	0.0075	AQP3
-2.67	0.0021	0.0329	KCTD21
-2.67	0.0022	0.0339	ZSWIM1
-2.66	4.69e-06	0.0003	RIMBP3
-2.66	0.0001	0.0033	IL10RA
-2.66	0.0004	0.0092	SSBP3
-2.66	0.0005	0.0112	MCM7
-2.66	0.0014	0.0236	ACSS2
-2.65	7.68e-05	0.0025	LPCAT4
-2.64	2.15e-07	1.96e-05	ZFYVE9
-2.64	5.67e-07	4.6e-05	TOB1
-2.64	0.0001	0.0038	IRF2BPL
-2.63	1.93e-06	0.0001	HIP1
-2.63	0.0002	0.0049	HVCN1
-2.62	4.28e-05	0.0016	PIK3C2B
-2.62	0.0024	0.0356	ANKZF1
-2.61	1.04e-05	0.0005	ABCA7
-2.61	8.66e-05	0.0028	NLRP1
-2.61	0.0015	0.0252	SORL1
-2.61	0.0031	0.043	SULT1A4;
-2.61	0.0031	0.0436	USP13
-2.6	5.45e-05	0.0019	ENPP5
-2.6	0.0001	0.0035	IL27RA
-2.59	0.0004	0.0085	C16orf54
-2.59	0.0004	0.0087	NELL2
-2.59	0.0009	0.0169	PIEZO1
-2.58	6.13e-06	0.0003	ST6GALNAC4
-2.58	1.37e-05	0.0006	B3GNT8
-2.58	3.63e-05	0.0014	ZNF827
-2.58	4.2e-05	0.0016	QSOX1
-2.58	0.0001	0.0033	ZBTB16
-2.58	0.0005	0.0104	SORL1
-2.58	0.0034	0.0457	KHDC1
-2.57	4.42e-06	0.0003	IKBKE
-2.57	0.0008	0.0154	FBXL20
-2.56	3.54e-05	0.0014	ANKH
-2.56	0.0002	0.0056	MAPK3
-2.56	0.0004	0.01	ELOVL4
-2.54	2.73e-05	0.0011	GPX3
-2.54	0.0017	0.0275	NSG1;
-2.53	9.39e-05	0.003	FAM45A
-2.53	0.0002	0.0051	ZNF792
-2.53	0.0003	0.0084	HIST1H4E
-2.52	1.45e-06	0.0001	TPM1
-2.52	5.56e-06	0.0003	FBXO10
-2.52	1.1e-05	0.0005	KDM1B
-2.52	1.85e-05	0.0008	GAS7
-2.52	0.0006	0.0134	XRCC6BP1
-2.52	0.0007	0.0138	MAPK8IP3
-2.51	4.94e-06	0.0003	PPM1M
-2.51	0.0002	0.0046	NMT2
-2.5	0.0006	0.0118	HEATR5A
-2.5	0.0007	0.0146	BPGM
-2.49	1.62e-06	0.0001	SNRNP25
-2.49	3.67e-05	0.0014	FOXO4
-2.49	6.32e-05	0.0022	MLLT3
-2.48	1.78e-05	0.0008	KAT6B
-2.48	0.001	0.0186	BIRC3
-2.48	0.0028	0.0405	THEM4
-2.47	6.66e-05	0.0022	THOC3
-2.47	0.0002	0.0048	SASH3
-2.47	0.0002	0.0049	SCAND2P
-2.47	0.0004	0.0086	PDGFB
-2.47	0.0008	0.0155	ABHD15
-2.46	2.35e-06	0.0002	MIS18BP1
-2.46	2.89e-06	0.0002	FLOT2
-2.46	0.0001	0.0034	ZNF780A
-2.46	0.0002	0.0044	CIDEB
-2.46	0.0002	0.0062	C2orf15
-2.46	0.0004	0.0092	CAT
-2.46	0.0009	0.0177	TNFRSF10A
-2.45	1.69e-06	0.0001	BNIP3L
-2.45	0.0009	0.017	TMEM120A
-2.44	4.42e-05	0.0016	MYRF
-2.44	7.06e-05	0.0023	PYGB
-2.44	0.0002	0.0047	CCDC107
-2.44	0.0015	0.0255	ZNF763
-2.44	0.0026	0.0382	ABHD17A
-2.44	0.0031	0.0432	ANKRD42
-2.43	2.51e-06	0.0002	RBL2
-2.43	0.0005	0.0101	TBC1D2B
-2.43	0.0036	0.0476	ST6GALNAC6
-2.42	2.61e-06	0.0002	S1PR1
-2.42	3.62e-05	0.0014	CABIN1
-2.42	0.0002	0.0049	YPEL2
-2.42	0.0007	0.0139	EXT1;
-2.42	0.0011	0.02	MATK
-2.41	0.0002	0.0056	MICAL2
-2.41	0.0004	0.0098	ARHGEF18
-2.41	0.0013	0.0225	LINGO4
-2.41	0.0019	0.0306	TSTD3
-2.41	0.0023	0.0345	TPCN1
-2.4	0.0002	0.0049	ZNF780A
-2.4	0.0005	0.0117	ACSS1
-2.4	0.0038	0.0495	CCR7
-2.39	0.0003	0.0071	DNMBP
-2.38	0.0004	0.0085	PPT2;
-2.38	0.0004	0.0087	DUSP1
-2.38	0.0031	0.0433	MARCH9
-2.37	0.0005	0.0104	ZYG11B
-2.37	0.0007	0.0136	PHLDB2;
-2.37	0.0008	0.0161	MGST2
-2.37	0.0021	0.0323	CDK5
-2.36	2.74e-05	0.0011	ATRN
-2.35	1.35e-06	9.67e-05	LGALS3
-2.35	0.0003	0.0073	ANKRA2
-2.35	0.001	0.0193	SMPD2
-2.35	0.0032	0.0439	WDR73
-2.34	3.05e-05	0.0012	PGM3
-2.34	0.0022	0.0338	ARHGAP21
-2.33	1.08e-05	0.0005	CCDC28A
-2.33	6.8e-05	0.0023	PDZD8
-2.33	0.0014	0.0243	PIGX
-2.32	5.17e-05	0.0018	ZMIZ1
-2.32	5.59e-05	0.0019	DUSP7
-2.32	0.0002	0.0046	TOM1
-2.32	0.0003	0.0071	C2CD4D
-2.32	0.0006	0.0128	FHOD1
-2.31	5.71e-06	0.0003	AKNA
-2.3	1.11e-05	0.0005	KAT6B
-2.3	2.8e-05	0.0011	RPS6KA1
-2.3	7.02e-05	0.0023	ITPKB
-2.3	0.0016	0.0264	SMAD7
-2.29	1.48e-05	0.0007	CDK2AP2
-2.29	4.87e-05	0.0018	ST3GAL5
-2.29	5.29e-05	0.0019	STAG3L3;
-2.28	1.19e-05	0.0006	TMC8
-2.28	2.32e-05	0.001	HABP4
-2.28	0.0002	0.0044	BCL9L
-2.28	0.003	0.0422	GNPTAB
-2.27	8.26e-06	0.0004	S1PR4
-2.27	0.0001	0.0036	PREPL
-2.27	0.0022	0.0342	SPATA25
-2.27	0.0027	0.0391	GPR132
-2.26	0.0002	0.0048	ATG2A
-2.26	0.0005	0.011	CAMKMT
-2.26	0.0022	0.0339	SLC2A1
-2.26	0.0035	0.0475	CLIC5
-2.25	0.0001	0.004	ETNK2
-2.25	0.0002	0.0056	FAM102A
-2.25	0.0002	0.0058	FLCN
-2.25	0.0004	0.0098	FAM63B
-2.25	0.0005	0.0103	CNNM3
-2.25	0.0005	0.0113	LAT
-2.25	0.002	0.031	SCRN1
-2.24	3.56e-05	0.0014	CDKN1B
-2.24	0.0002	0.0054	DIRC2
-2.24	0.0013	0.0229	CTSA
-2.23	9e-07	6.84e-05	AGAP3
-2.23	2.87e-06	0.0002	MYO1F
-2.23	4.45e-05	0.0016	PLD1
-2.23	5.37e-05	0.0019	UNC13D
-2.23	9.51e-05	0.003	APMAP
-2.23	0.0002	0.0048	NTHL1
-2.23	0.0006	0.0132	AGO4
-2.23	0.0014	0.0233	DAPK2
-2.23	0.0014	0.0236	APPL2
-2.22	2.86e-05	0.0011	TMEM14A
-2.22	0.0001	0.0035	DYRK1B
-2.22	0.0005	0.011	FAM134C
-2.22	0.0006	0.0123	ADCY7
-2.22	0.0007	0.0138	GRK4
-2.22	0.0007	0.0139	TRAPPC4
-2.22	0.0012	0.0216	ERCC2
-2.21	1.18e-05	0.0006	VPS13A
-2.21	1.23e-05	0.0006	SPN
-2.21	4.95e-05	0.0018	FAM217B
-2.21	0.0001	0.0036	STARD10
-2.21	0.0008	0.0152	DNASE1
-2.2	9.35e-05	0.003	FCMR
-2.2	0.001	0.018	NAPEPLD
-2.19	5.31e-05	0.0019	PPARD
-2.19	0.0004	0.0093	CDC25B
-2.19	0.0015	0.0255	FUT10
-2.19	0.0025	0.0369	WDR54
-2.18	5.46e-06	0.0003	AMICA1
-2.18	1.28e-05	0.0006	EDRF1
-2.18	1.84e-05	0.0008	RNF168
-2.18	3.81e-05	0.0014	CRTC2
-2.18	0.0001	0.0032	DNAJB2
-2.18	0.0003	0.007	EXT1
-2.17	3.19e-06	0.0002	RITA1
-2.17	3.98e-05	0.0015	SLC35E2B
-2.17	0.0001	0.0039	LSR
-2.17	0.0002	0.0062	ARHGAP9
-2.17	0.0009	0.0173	ATG16L1
-2.17	0.0037	0.0488	KLHL24
-2.16	9.79e-07	7.36e-05	FERMT3
-2.16	0.0006	0.0125	TSPAN32
-2.15	0.0003	0.0073	TIAF1;
-2.15	0.0006	0.0118	ATG16L1
-2.14	1.13e-05	0.0005	RPARP-AS1
-2.14	7.75e-05	0.0025	SIRT4
-2.14	0.0001	0.0042	QSER1
-2.14	0.002	0.0315	MAP3K12
-2.13	9.01e-06	0.0004	CERK
-2.13	5.86e-05	0.002	CNPY3
-2.13	0.0001	0.0034	PRSS53
-2.13	0.0001	0.0037	TDP1
-2.13	0.0002	0.0046	ST6GALNAC2
-2.13	0.0002	0.0048	KAT6B
-2.13	0.0002	0.0048	ZFP36L2
-2.12	0.0001	0.0036	UNC119
-2.12	0.0007	0.0144	TRIM8
-2.12	0.0011	0.0207	PIP5K1C
-2.12	0.0012	0.0216	SMURF2
-2.11	1.73e-05	0.0008	PLEKHM3
-2.11	0.0031	0.0433	CAMK4
-2.1	2.94e-05	0.0012	ITGAL
-2.1	0.0003	0.008	VPS33A
-2.1	0.0011	0.0204	ZBTB7B
-2.1	0.0013	0.0229	GK5
-2.09	4.08e-05	0.0015	ARHGAP19-SLIT1
-2.09	4.65e-05	0.0017	CLASP1
-2.09	0.0006	0.0131	B4GAT1
-2.09	0.0018	0.0294	ATP11A
-2.09	0.0027	0.0387	GNA12
-2.09	0.0035	0.047	CMIP
-2.08	3.71e-05	0.0014	BBC3;
-2.08	7.01e-05	0.0023	TWF2
-2.08	8.28e-05	0.0027	2001-09-01
-2.08	0.0005	0.0117	ATG16L1
-2.08	0.0012	0.0212	ANKMY2
-2.07	0.0012	0.0212	SSH1
-2.06	0.0012	0.0217	LTB
-2.06	0.0014	0.0236	PECR
-2.06	0.0014	0.0241	TMIGD2
-2.06	0.0017	0.0274	SLC35E3
-2.05	6.95e-05	0.0023	IFNAR2
-2.05	0.0002	0.0046	MAP2K1
-2.05	0.0005	0.0111	NAT6
-2.05	0.0005	0.0117	SNX16
-2.05	0.0011	0.0199	MAP1S
-2.04	0.0001	0.0037	BMF
-2.04	0.0002	0.0046	TRGJ1;
-2.04	0.0003	0.008	ZNF780A
-2.04	0.0008	0.0154	PLN
-2.03	6.09e-06	0.0003	CXCR4
-2.03	3.19e-05	0.0012	DYRK1B
-2.03	5.2e-05	0.0018	ZMYND8
-2.03	6.49e-05	0.0022	TBC1D10A
-2.03	0.0002	0.0062	PI4K2A
-2.03	0.0006	0.0122	STRBP;
-2.03	0.0008	0.0157	NUMA1
-2.03	0.003	0.0422	TTC8
-2.02	2.27e-05	0.001	SMAP2
-2.02	4.25e-05	0.0016	FGD3
-2.02	0.0001	0.0036	WIPI2
-2.02	0.0006	0.0127	CEP85L
-2.02	0.0008	0.0165	CBR4
-2.02	0.001	0.0187	ARHGAP12
-2.02	0.0011	0.0205	AHNAK
-2.01	0.0001	0.0031	MYO1F
-2.01	0.0002	0.0057	OSBPL8
-2.01	0.0011	0.0208	TXNIP
-2.01	0.0012	0.0209	CKAP5;
-2.01	0.0019	0.0307	TTC22
-2.01	0.0021	0.0328	RPS6KA1
-2	4.25e-05	0.0016	PQLC2
-2	4.86e-05	0.0018	ABHD14A
-2	0.0002	0.006	HPS3
-2	0.0019	0.0304	FAM102A

## Sheet: Upregulated in CD8conv
Fold change	P-Val	FDR P-Val	Gene Symbol
906.44	5.63e-17	3.02e-13	IFIT1
674.48	3.81e-17	2.73e-13	OAS1
497.37	5.41e-14	4.83e-11	IFI44L
323.15	1.05e-16	3.75e-13	USP41
229.41	1.39e-13	1.02e-10	IFIT3
220.38	1.53e-20	3.28e-16	USP18
177.92	2.6e-17	2.73e-13	IFI6
160.79	4.63e-14	4.31e-11	RSAD2
138.47	2.49e-13	1.57e-10	MX1
135.13	3.1e-14	3.48e-11	LGALS9
132	3.61e-16	1.11e-12	IFIT2
129.98	3.72e-13	2.22e-10	CMPK2
114.47	5.01e-15	9.77e-12	LAMP3
82.05	5.4e-16	1.3e-12	HERC5
78.91	4.38e-14	4.27e-11	IFI44
75.85	5.43e-12	2.35e-09	ISG15
54.07	5.47e-16	1.3e-12	SPATS2L
52.33	4.16e-14	4.25e-11	RTP4
48.07	8.32e-17	3.57e-13	OAS3
43.73	1.3e-10	3.78e-08	MX2
43.4	8.79e-10	2.14e-07	CD38
38.64	8.59e-15	1.54e-11	HELZ2
35.7	1.16e-14	1.74e-11	OASL
33.81	2.42e-15	5.2e-12	SAMD9L
30.92	1.12e-08	2.02e-06	EPSTI1
30.84	1.08e-14	1.74e-11	HERC6
28.63	1.59e-13	1.1e-10	LY6E
28.51	1.54e-14	1.94e-11	OAS2
26.8	4.7e-11	1.59e-08	PLSCR1
26.74	1.5e-14	1.94e-11	EIF2AK2
26.08	4.9e-12	2.24e-09	DDX60L
25.57	6.72e-14	5.77e-11	IRF7
25.22	2.25e-13	1.46e-10	DDX60
24.61	1.69e-12	8.63e-10	BST2
24.01	6.59e-13	3.62e-10	PNPT1
21.54	2.07e-11	7.94e-09	PARP9
21.03	3.59e-08	5.67e-06	ETV7
20.96	7.72e-10	1.93e-07	XAF1
19.35	2.8e-14	3.33e-11	IFIT5
16.15	5.71e-11	1.8e-08	TNFSF10
16.13	1.22e-14	1.74e-11	NT5C3A
15.55	1.47e-08	2.54e-06	RASGRP3
15.31	7.53e-12	3.05e-09	HSH2D
14.94	3e-09	6.33e-07	NEXN
14.78	3.38e-10	9.06e-08	ZBP1
14.72	9.64e-14	7.66e-11	TRIM25;
14.64	1.43e-13	1.02e-10	PI4K2B
14.37	6.66e-12	2.8e-09	LGALS9C;
14.01	2.05e-13	1.38e-10	IFIH1
13.81	8.65e-09	1.6e-06	MT2A
13.7	5.1e-11	1.64e-08	DDX58
13.03	5.17e-12	2.31e-09	LAP3
12.65	4.46e-13	2.55e-10	MOV10
12.47	1.07e-10	3.27e-08	PRKD2
12.36	5.48e-12	2.35e-09	IFITM3
12.22	7.43e-09	1.44e-06	PIM1
12.03	6.39e-05	0.0032	BCL2L14
11.86	2.7e-13	1.66e-10	PARP14
11.82	1.01e-09	2.37e-07	CNP
11.73	4.95e-08	7.64e-06	SLC38A5
11.49	3.45e-08	5.48e-06	DHX58
11.13	5.13e-11	1.64e-08	LGALS9B
10.92	4.47e-09	9.22e-07	APOL6
10.55	3.24e-14	3.48e-11	SAMD9
10.55	0.0003	0.0115	PMAIP1
10.17	7.86e-06	0.0006	CXCL10
10.1	3.12e-08	4.99e-06	BATF3
9.96	6.96e-05	0.0035	BCL2L14
9.89	5.2e-08	7.97e-06	STAT1
9.83	8.07e-05	0.0039	CXorf21
9.63	2.84e-12	1.38e-09	STAT2
9.56	9.89e-08	1.45e-05	ZNRF1
9.55	6.15e-10	1.57e-07	HERC6
9.45	2.54e-11	9.4e-09	PARP12
9.19	8.97e-12	3.56e-09	IFI35
9.07	1.4e-13	1.02e-10	TRIM21
9.04	9.86e-12	3.85e-09	PML
9.04	6.6e-11	2.05e-08	FBXO6
8.56	1.14e-09	2.6e-07	RNF213
8.42	2.35e-07	3.05e-05	GPR155
8.41	3.75e-11	1.3e-08	IFITM1
8.37	4.11e-10	1.08e-07	TDRD7
8.22	4.89e-12	2.24e-09	PHF11
8.21	1.58e-12	8.29e-10	RBCK1
8.06	8.59e-14	7.09e-11	ISG20
8.05	0.0001	0.0047	TNFSF13B
7.96	7.35e-12	3.03e-09	NMI
7.95	2.45e-11	9.21e-09	MVB12A;
7.93	1.28e-05	0.0009	FAM46A
7.89	1.2e-07	1.7e-05	APOL1
7.71	1.31e-07	1.81e-05	PGAP1
7.68	1.33e-09	3.01e-07	TRIM14
7.65	9.66e-10	2.3e-07	TRIM22
7.59	5.42e-10	1.4e-07	SAT1
7.5	1.69e-06	0.0002	IRF9
7.48	2.17e-09	4.8e-07	LRP8
7.43	7.13e-07	8.09e-05	LAP3
7.28	8.83e-09	1.62e-06	UNC93B1
7.24	4.52e-13	2.55e-10	SP110
7.13	2.17e-12	1.08e-09	TMEM229B
7.09	8.16e-09	1.53e-06	CCR1
7.01	4.71e-12	2.24e-09	ZCCHC2
7.01	9.46e-07	0.0001	PTMS
6.95	4.72e-08	7.34e-06	CD274
6.94	9.55e-10	2.3e-07	EHD4
6.91	3.49e-11	1.27e-08	DTX3L
6.88	3.74e-11	1.3e-08	PARP11
6.78	1.3e-10	3.78e-08	TRAFD1
6.38	1.36e-12	7.27e-10	MYD88
6.29	5.09e-11	1.64e-08	C19orf66
6.22	7.09e-05	0.0035	MAP3K8
6.18	1.14e-09	2.6e-07	CHST12
6.13	3.74e-10	9.9e-08	TRANK1
6.04	4.75e-11	1.59e-08	TRIM22
5.99	2.26e-07	2.98e-05	CHST12
5.88	7.14e-10	1.8e-07	NUB1
5.84	6.7e-06	0.0005	IL12RB2
5.8	2.63e-08	4.27e-06	PPM1K
5.8	1.19e-07	1.7e-05	ECE1
5.74	5.75e-06	0.0005	BRCA2
5.72	7.1e-09	1.4e-06	ZNFX1
5.68	2.24e-08	3.7e-06	CDKL1
5.65	2.23e-10	6.21e-08	UBE2L6
5.64	1.11e-10	3.36e-08	CMTR1
5.63	1.35e-06	0.0001	PCGF5
5.54	9.7e-06	0.0007	MAF
5.5	2.19e-08	3.64e-06	GPR180
5.44	1.08e-07	1.56e-05	SMTNL1
5.41	2.86e-10	7.76e-08	XRN1
5.35	0.0002	0.0066	IL18R1
5.27	9.67e-09	1.76e-06	GBP4
5.26	4.95e-07	5.96e-05	ZNFX1
5.21	5.46e-09	1.09e-06	TAP2
5.16	2.18e-05	0.0013	TLR3
5.14	4.16e-06	0.0004	GCA
5.13	1.81e-08	3.09e-06	SLC37A1
5.11	0.0011	0.0284	TRIB1
5.01	1.3e-07	1.81e-05	ARHGEF3
5	9.94e-07	0.0001	SBNO2
4.97	1.83e-10	5.15e-08	LPIN2
4.95	1.85e-08	3.11e-06	RALB
4.93	0.0004	0.014	OR56B1
4.91	2.64e-07	3.38e-05	ADAM19
4.9	2.98e-07	3.71e-05	GBP5
4.87	8.2e-09	1.53e-06	LY6E
4.86	2.93e-09	6.29e-07	AZI2
4.86	2.35e-08	3.85e-06	TIPIN
4.82	1.34e-10	3.82e-08	SP100
4.82	0.0004	0.0147	TIMD4
4.81	4.83e-09	9.78e-07	LAG3
4.75	6.09e-05	0.0031	RPS6KA5
4.74	2.28e-05	0.0014	LY96
4.71	8.22e-06	0.0006	FNDC3B
4.71	2.27e-05	0.0014	CFH
4.67	2.8e-10	7.71e-08	CHMP5
4.67	1.49e-06	0.0002	OPN3
4.65	3.04e-09	6.33e-07	KIAA0040
4.65	1.38e-06	0.0001	SNTB1
4.64	1.6e-09	3.59e-07	DYNLT1
4.63	2.86e-05	0.0017	PLSCR2
4.63	0.0006	0.0188	METRNL
4.58	1.42e-06	0.0002	AKAP2
4.55	3.11e-06	0.0003	CSF1
4.53	1.08e-05	0.0008	HAPLN3
4.51	9.74e-08	1.45e-05	SLFN5
4.51	0.0012	0.0315	PRF1
4.47	1.41e-08	2.46e-06	C7orf49
4.47	4.5e-05	0.0024	BCL2L14
4.37	1.3e-06	0.0001	IFITM2
4.35	1.17e-10	3.5e-08	CASP1
4.35	0.0009	0.0246	WARS
4.34	0.0002	0.0071	CMTM8
4.34	0.0007	0.0201	MCOLN3
4.32	5.21e-06	0.0004	flawmawbo;
4.26	1.65e-08	2.84e-06	TMEM140
4.24	0.0001	0.0049	STK3
4.22	1.95e-05	0.0012	TMEM244
4.2	2.96e-07	3.71e-05	FAM122C
4.19	6.65e-07	7.65e-05	GBP1
4.18	1.31e-08	2.34e-06	TMEM126B
4.17	9.75e-10	2.3e-07	ADAR
4.15	3.57e-11	1.28e-08	STOM
4.13	7.9e-10	1.95e-07	TRIM38
4.12	5.58e-07	6.62e-05	LMNB1
4.12	1.79e-06	0.0002	SAMHD1
4.1	0.0001	0.0061	ATP10A
4.08	5.59e-07	6.62e-05	SCLT1
4.07	2.04e-06	0.0002	PRKAG2
4.05	5.49e-08	8.36e-06	TTC39B
4.02	9.58e-05	0.0045	SLFN13
4.01	0.0013	0.0341	KLF5
4	1.77e-05	0.0011	MVP;
3.98	4.82e-09	9.78e-07	ARSB
3.92	1.5e-06	0.0002	APOL2
3.92	0.0003	0.0108	SECTM1
3.91	1.52e-05	0.001	CREM
3.91	2.72e-05	0.0016	IL15
3.88	3.66e-08	5.74e-06	CD164
3.85	9.73e-07	0.0001	ITIH4
3.82	3.03e-09	6.33e-07	BAG1
3.81	2.34e-06	0.0002	DAPP1
3.78	1.19e-06	0.0001	TRIM34
3.76	4.39e-06	0.0004	C14orf159
3.75	1.23e-06	0.0001	ANKFY1
3.74	3.22e-05	0.0018	C4orf32
3.73	0.0004	0.0147	CHRNA6
3.68	1.33e-07	1.83e-05	SMCHD1
3.67	0.0005	0.0169	SLC18B1
3.66	2.17e-06	0.0002	TBC1D1
3.57	8.03e-06	0.0006	ACTA2
3.56	1.18e-07	1.69e-05	MCOLN2
3.53	4.36e-07	5.35e-05	DOCK10
3.51	2.99e-05	0.0017	CCR5
3.48	5.98e-07	6.97e-05	PRDX4
3.48	1.02e-05	0.0007	LNPEP
3.45	2.23e-09	4.88e-07	DRAP1
3.44	1.49e-06	0.0002	RAVER2
3.44	5.31e-05	0.0028	CISH
3.44	9.51e-05	0.0045	SEMA4A
3.37	2.62e-07	3.37e-05	FAR2
3.37	0.0001	0.0049	HELB
3.36	4.39e-07	5.35e-05	TRIM6-TRIM34
3.35	4.13e-07	5.09e-05	TUBA8
3.35	1.33e-05	0.0009	CARD17
3.34	6.67e-07	7.65e-05	GIMAP8
3.33	0.0001	0.0061	CCDC146
3.32	1.86e-08	3.11e-06	N4BP1
3.32	2.77e-07	3.52e-05	YEATS2
3.32	9.76e-06	0.0007	SOCS2
3.32	0.0006	0.0186	C3AR1
3.29	1.06e-05	0.0008	PARP10
3.29	0.0007	0.0198	ADAMTSL4-AS1
3.28	1.75e-05	0.0011	IRS1
3.26	1.53e-07	2.05e-05	NAPA
3.26	0.0007	0.0212	MB21D1
3.22	6.1e-07	7.07e-05	KPNB1
3.2	1.09e-05	0.0008	TRIM5
3.18	1.36e-08	2.41e-06	VPS37B
3.18	2.2e-06	0.0002	TRIM56
3.18	1.75e-05	0.0011	LMO4
3.17	2.63e-06	0.0002	SCML4
3.16	0.0003	0.01	RGS1
3.12	5.7e-08	8.61e-06	RIPK1
3.12	4.54e-06	0.0004	TNK2
3.11	2.46e-06	0.0002	CLUAP1
3.1	3.24e-06	0.0003	NRSN2-AS1
3.1	2.68e-05	0.0016	QKI
3.1	0.0001	0.0058	NXT2
3.09	0.0005	0.0169	LACTB
3.08	2.85e-08	4.6e-06	MASTL
3.08	8.04e-06	0.0006	BAK1
3.07	1.47e-05	0.001	TMEM62
3.07	0.0001	0.0049	BCL2L14
3.06	6.39e-06	0.0005	GCH1
3.06	9.19e-06	0.0007	SOD2
3.06	1.05e-05	0.0008	STX17
3.05	5.77e-06	0.0005	NDC80
3.05	1.31e-05	0.0009	PCYT1A
3.05	0.0001	0.0063	REC8
3.04	1.47e-06	0.0002	SPTLC2
3.04	3.96e-06	0.0004	USP15;
3.03	4.69e-06	0.0004	GTPBP1
3.01	2.46e-09	5.33e-07	CARD16
3.01	1.31e-05	0.0009	GORASP1
3.01	3.68e-05	0.002	MTHFD2
3	7.44e-05	0.0037	PXYLP1
2.98	1.37e-07	1.86e-05	ME2
2.97	5.06e-07	6.06e-05	C5orf56
2.97	0.0002	0.0089	BCL2L14
2.96	1.24e-07	1.73e-05	AFF1
2.93	1.95e-05	0.0012	RNF31
2.92	3.67e-06	0.0003	ZC3HAV1
2.9	6.1e-09	1.21e-06	SP140
2.9	0.0004	0.0145	TMEM139
2.88	0.0001	0.0063	JAK2
2.87	6.29e-05	0.0032	AMBRA1
2.86	4.78e-05	0.0026	MLLT6
2.85	1.79e-06	0.0002	TMEM185B
2.85	6.7e-05	0.0034	P2RX5
2.85	0.0008	0.0232	PRDM1
2.83	5.29e-05	0.0028	MTBP
2.81	8.09e-09	1.53e-06	NDUFA9
2.81	4.23e-06	0.0004	TYMP;
2.81	0.0016	0.038	JAK2
2.8	5.6e-06	0.0004	NABP1
2.8	1.25e-05	0.0009	TTC21A;
2.79	3.39e-06	0.0003	STAT3
2.79	7.36e-06	0.0006	FEM1C
2.79	4.93e-05	0.0026	PSME2;
2.78	8.76e-06	0.0006	MYC
2.78	0.0001	0.0048	GCSAM
2.75	6.27e-06	0.0005	IL6ST
2.75	0.0018	0.0415	RGS13
2.74	1.64e-07	2.18e-05	IRF2
2.74	3.59e-05	0.002	AKAP3
2.73	0.0002	0.0071	CHAC1
2.72	1.78e-07	2.36e-05	TMX1
2.72	2.08e-06	0.0002	SIDT1
2.72	2.31e-06	0.0002	GIMAP4
2.71	7.24e-09	1.41e-06	PSMB8
2.69	6.31e-05	0.0032	SLFN12
2.68	1.64e-06	0.0002	SLC25A28
2.68	1.9e-06	0.0002	ARID5A
2.68	4.24e-06	0.0004	SQRDL
2.68	1.61e-05	0.0011	NANS
2.67	6.81e-07	7.77e-05	IPCEF1
2.66	8.12e-09	1.53e-06	IFI16
2.66	7.54e-07	8.51e-05	NRDC;
2.64	1.45e-07	1.95e-05	CTSS
2.63	2.86e-05	0.0017	MAD2L2
2.62	0.0003	0.0099	SFMBT2
2.61	0.0002	0.0085	GANC
2.56	4.06e-06	0.0004	NCOA7
2.56	0.0009	0.0256	ERAP2
2.56	0.0018	0.0416	LINC00260
2.55	8.29e-06	0.0006	SLC14A1
2.55	0.0001	0.0053	SOGA3;
2.55	0.0006	0.019	DLL1
2.54	2.18e-05	0.0013	DNAJA1
2.54	0.0002	0.0092	TANK
2.53	2.34e-07	3.05e-05	KCNA3
2.53	5.85e-06	0.0005	DNPEP
2.53	0.0005	0.017	RSAD2
2.52	2.53e-07	3.27e-05	MAML2
2.49	0.0001	0.0061	AC010894.3;
2.47	3.76e-05	0.0021	NUDCD1
2.47	0.0006	0.018	PCYT1A
2.46	1.21e-05	0.0008	NOD1
2.46	0.0008	0.0231	FAM84B
2.46	0.001	0.0282	TOP1
2.45	3.41e-06	0.0003	MSL3
2.45	0.0007	0.02	LINS1
2.45	0.0012	0.0315	ARHGAP11B
2.44	5.03e-06	0.0004	ANXA2R
2.44	1.3e-05	0.0009	BCL2L14
2.44	0.0005	0.0175	GMPR
2.44	0.0008	0.0227	ARHGAP11B;
2.43	0.0002	0.0079	GBP6
2.43	0.0009	0.0259	IFI27
2.42	1.77e-06	0.0002	SNX6
2.42	5.12e-06	0.0004	PSMB10
2.42	2.86e-05	0.0017	AIM2
2.41	6.38e-06	0.0005	L3MBTL3
2.4	0.0002	0.0073	TMEM173
2.39	1.02e-07	1.48e-05	CASP4
2.39	1.95e-05	0.0012	MLKL
2.39	0.0002	0.0064	PPP1CC
2.38	0.0004	0.0145	KLHL8
2.37	3.42e-05	0.0019	MUSTN1
2.37	0.0014	0.0347	ATF3
2.36	7.06e-05	0.0035	TMEM110-MUSTN1;
2.36	0.0002	0.0077	SRGAP2
2.36	0.0009	0.0245	BCL2L14
2.35	2.66e-06	0.0002	GNG5
2.35	0.0002	0.0077	SCARB2
2.35	0.0007	0.0215	NLRC5
2.35	0.0008	0.0228	P2RX5-TAX1BP3
2.34	2.81e-07	3.55e-05	UPP1
2.34	2.94e-05	0.0017	ETV6
2.34	4.32e-05	0.0023	AIDA
2.34	6.61e-05	0.0033	PRKCE
2.34	0.0016	0.0383	LOC100133669;
2.33	2.84e-06	0.0003	ODF2L
2.33	8.43e-06	0.0006	OGFR
2.33	1.67e-05	0.0011	UBA7;
2.32	0.0002	0.0085	SGCB
2.31	5.37e-06	0.0004	GBP3
2.31	0.0003	0.0111	TAPT1
2.3	9.35e-06	0.0007	PMF1;
2.29	6.34e-05	0.0032	BCL2L14
2.28	2.71e-05	0.0016	HMHB1
2.28	3.03e-05	0.0017	PSAT1
2.28	4.98e-05	0.0026	HIF1A
2.27	3.2e-05	0.0018	CNDP2
2.27	0.0011	0.0287	ARHGAP11B
2.26	8.84e-05	0.0042	UBE2L6
2.26	0.0019	0.0435	HDAC4
2.26	0.002	0.0454	PUS7
2.25	0.0001	0.0056	IL15RA
2.24	1.09e-05	0.0008	KRT19
2.24	0.0002	0.0066	BCL2L14
2.24	0.0007	0.0204	TARBP1
2.24	0.0019	0.0433	ZNF680
2.23	2.77e-05	0.0016	SP140L
2.23	8.8e-05	0.0042	APOL3
2.22	7.4e-06	0.0006	UBXN2A
2.22	3.39e-05	0.0019	PTPN1
2.21	5.03e-05	0.0026	RBM7
2.2	1.99e-06	0.0002	IDH2
2.2	1.74e-05	0.0011	USP42
2.2	0.0011	0.0296	ELF1
2.19	1.39e-05	0.0009	METTL4
2.19	0.0014	0.0342	CREBRF
2.18	3.25e-05	0.0018	COA6
2.18	0.0001	0.0049	ACO1
2.18	0.0008	0.0238	APOO
2.17	1.04e-06	0.0001	TINF2
2.17	1.16e-06	0.0001	GBP2
2.17	0.0003	0.0098	ASAH2B
2.17	0.0015	0.0359	MICB
2.16	5.8e-06	0.0005	FMR1
2.15	0.0003	0.0107	CLIP1
2.14	2.48e-05	0.0015	MIER1
2.14	0.0001	0.0049	FAM214A
2.14	0.0003	0.0112	PDE4B
2.13	2.79e-06	0.0003	PSMB9
2.13	9.78e-06	0.0007	TRERF1
2.13	0.0001	0.0049	MMD
2.13	0.0002	0.0071	TMEM106A
2.13	0.0022	0.0476	TMEM200A
2.12	0.0002	0.0078	MANEA
2.12	0.0019	0.0427	SULF2
2.11	1.6e-05	0.001	LNPEP
2.11	4.33e-05	0.0023	BCL6
2.11	0.0002	0.0078	GPR171
2.11	0.0013	0.0334	C1GALT1
2.1	5.76e-07	6.79e-05	GTPBP2
2.1	0.0001	0.0055	TRAK2
2.1	0.0009	0.0243	AIM1
2.1	0.0022	0.0486	ELF4
2.09	0.0004	0.0123	SLC25A44
2.08	1.43e-06	0.0002	HIVEP2
2.07	4.51e-06	0.0004	CD2AP
2.07	7.29e-05	0.0036	ODF3B
2.06	0.0007	0.0215	GIMAP6
2.05	4e-06	0.0004	CD47
2.05	4.61e-06	0.0004	MRPL17
2.05	3.04e-05	0.0017	PSMA6
2.05	3.32e-05	0.0019	CD48
2.05	0.0004	0.0133	CCZ1;
2.05	0.0014	0.0353	C12orf66
2.04	0.0007	0.0204	SLC7A11
2.04	0.0014	0.0343	ANXA3
2.03	0.0004	0.014	SRGAP2C
2.02	0.0001	0.0063	ARHGAP17
2.02	0.0003	0.0121	KAT2A
2.02	0.0007	0.0208	GSDMD
2.02	0.0009	0.0256	KDSR
2.02	0.0011	0.0298	LIPA
2.02	0.002	0.0451	JAK3
2	0.0016	0.0375	ZNF672

## Sheet: Downregulated in CD8conv
Fold change	P-Val	FDR P-Val	Gene Symbol
-7.06	8.35e-06	0.0006	SIRPG
-6.49	5.56e-06	0.0004	VSIG1
-6.08	4.46e-07	5.41e-05	THRA
-5.39	5.9e-07	6.92e-05	PTCH1
-5.21	8.03e-08	1.2e-05	SEMA4C
-5.07	5.57e-06	0.0004	ENPP5
-4.91	1.39e-08	2.44e-06	TSC22D3
-4.66	0.0016	0.0379	TRAM2
-4.64	2.55e-06	0.0002	RGS2
-4.63	9.85e-08	1.45e-05	RASSF2
-4.06	0.0001	0.0063	CD27
-4.02	1.42e-06	0.0002	SEPT9
-4.02	1.54e-06	0.0002	IL16
-3.95	1.04e-05	0.0007	LIMK1
-3.91	1.93e-06	0.0002	PLXND1
-3.9	0.0009	0.0256	DUSP10
-3.89	6.45e-06	0.0005	SLC27A3
-3.87	1.29e-05	0.0009	STARD5
-3.8	0.0006	0.0177	ANKZF1
-3.79	0.0002	0.0073	NCAPH
-3.76	1.1e-07	1.58e-05	KDM2B
-3.7	2.02e-05	0.0013	IFFO2
-3.64	1.8e-05	0.0011	CNNM3
-3.63	5.04e-05	0.0026	TBC1D10C
-3.58	0.0003	0.0113	SH2D3C
-3.54	2.42e-05	0.0015	NLRC3
-3.5	2.42e-05	0.0015	TGFBR3
-3.49	2.23e-05	0.0014	ARRB1
-3.45	2.58e-06	0.0002	TRAF3IP3
-3.45	4.96e-05	0.0026	TOM1
-3.44	3.81e-05	0.0021	ITGB2
-3.41	0.0003	0.012	COLGALT2
-3.36	0.0004	0.0139	ANKRD42
-3.35	1.61e-06	0.0002	MOB3A
-3.35	1.63e-05	0.0011	DHRS3;
-3.34	1.23e-06	0.0001	UCP2
-3.34	0.0002	0.0076	CALHM2
-3.32	2.53e-05	0.0015	SFXN3
-3.29	3.92e-06	0.0003	CD5
-3.18	0.0001	0.0062	RGCC
-3.14	1.59e-05	0.001	KLRG1
-3.08	0.0001	0.0051	APBB1
-3.08	0.0019	0.043	VASH1
-3.07	0.0003	0.011	ERMP1
-3.03	0.0015	0.0362	SIT1
-2.99	0.0003	0.0096	AKTIP
-2.97	3.9e-06	0.0003	ESYT1
-2.95	2.31e-05	0.0014	SPECC1L-ADORA2A
-2.94	0.0001	0.0049	ADGRG5
-2.92	0.0007	0.0216	ATG9A
-2.91	0.0003	0.011	DRICH1
-2.89	0.0014	0.0342	TMEM204
-2.88	0.0001	0.0056	PDK2
-2.87	1.37e-07	1.86e-05	NOL4L
-2.87	0.0003	0.012	SIPA1
-2.85	0.0009	0.0248	AGFG2
-2.83	0.0002	0.0066	RNF166
-2.82	8.72e-05	0.0042	BNC2
-2.81	0.0005	0.0166	PSD4
-2.81	0.0005	0.0167	LDLRAP1
-2.8	0.0003	0.012	RASGEF1A
-2.8	0.0004	0.0143	ACTN1;
-2.76	0.0002	0.0066	YPEL3
-2.74	0.0006	0.0193	KATNAL1
-2.73	6.73e-05	0.0034	STARD10
-2.73	0.0004	0.0134	ARRDC2
-2.73	0.0005	0.017	CNPY4
-2.72	4.34e-05	0.0023	ITPRIPL1
-2.71	0.0004	0.0133	TNFAIP3
-2.69	0.0003	0.011	CAMKMT
-2.68	5.63e-05	0.0029	LCK
-2.66	0.0002	0.0065	FLNA
-2.64	1.25e-05	0.0009	RPS6KA1
-2.63	8.07e-05	0.0039	ITM2C
-2.6	5.76e-05	0.003	PPT2;
-2.59	0.0018	0.0411	PIK3C2B
-2.58	0.0016	0.038	TPCN1
-2.56	3.95e-05	0.0022	LAT
-2.56	0.0003	0.0097	DUSP2
-2.54	0.0003	0.0105	MXD4;
-2.53	0.0013	0.0323	LINC00612
-2.52	7.34e-06	0.0006	PIK3IP1
-2.52	0.0015	0.037	PCYOX1
-2.52	0.0016	0.038	NBPF9
-2.49	1.29e-05	0.0009	CNN2
-2.48	1.53e-05	0.001	MKNK2
-2.48	2.81e-05	0.0017	KCNAB2
-2.48	0.0009	0.0248	SLFN14
-2.48	0.0014	0.0353	ANKRD44
-2.48	0.0021	0.0461	PIK3R1
-2.47	0.0006	0.0189	RNF125
-2.46	6.23e-06	0.0005	HDAC5
-2.45	5.6e-05	0.0029	RPS6KA1
-2.45	0.0008	0.0224	RAB33A
-2.45	0.001	0.0281	NELL2
-2.43	0.0002	0.007	KCTD7
-2.42	1.15e-05	0.0008	UBASH3A
-2.42	1.63e-05	0.0011	MAP4K2
-2.41	2.27e-06	0.0002	MYO1F
-2.41	0.0003	0.0106	CCPG1;
-2.41	0.0007	0.0212	PIGL
-2.4	0.0001	0.0059	PBX4
-2.4	0.0011	0.0293	PFKFB3
-2.39	4.4e-05	0.0024	ATG2A
-2.38	9.33e-05	0.0044	TCP11L2
-2.37	1.23e-05	0.0009	YPEL4
-2.37	1.32e-05	0.0009	ZBTB25
-2.36	0.0016	0.0387	GPR132
-2.35	4.29e-06	0.0004	CNNM2
-2.35	8.65e-05	0.0042	ZNF318
-2.35	0.0001	0.0046	LPCAT4
-2.34	0.0007	0.0207	FBXO32
-2.33	0.0002	0.0078	SMAD3
-2.33	0.0009	0.0246	MYO1F
-2.32	0.0005	0.017	ANKH
-2.3	0.0001	0.0063	RASSF2
-2.3	0.0002	0.0065	TBC1D2
-2.29	6.02e-06	0.0005	CAMK2G
-2.29	0.0004	0.0139	VAMP1
-2.29	0.0005	0.0156	SAC3D1
-2.29	0.0006	0.0189	FLNA
-2.28	3.71e-05	0.0021	ARSK
-2.28	0.0005	0.0155	QSOX1
-2.28	0.0017	0.0404	FAM102A
-2.27	3.67e-07	4.55e-05	ZBTB1
-2.27	2.32e-05	0.0014	S100A4
-2.27	3.98e-05	0.0022	WDTC1
-2.27	0.0004	0.0145	GK5
-2.27	0.0023	0.049	SFXN5
-2.26	1.62e-05	0.0011	AGAP2
-2.26	5.02e-05	0.0026	KAT6B
-2.26	0.0013	0.0327	OGFRL1
-2.25	7.96e-05	0.0039	LSR
-2.25	0.0002	0.008	MVD
-2.25	0.001	0.0275	KLHL21
-2.25	0.001	0.0281	PLN
-2.24	0.0006	0.0184	ADCY3
-2.23	1.68e-05	0.0011	TMC8
-2.22	0.0003	0.011	PPM1A
-2.22	0.0005	0.0162	ACSS1
-2.21	9.71e-05	0.0045	UBE2T
-2.21	0.0016	0.0386	BMF
-2.2	3e-05	0.0017	FLOT2
-2.19	1.52e-06	0.0002	AMICA1
-2.19	0.0002	0.0077	MAP3K3
-2.19	0.0012	0.0314	EPHA4
-2.18	0.0003	0.0104	GLCCI1
-2.18	0.001	0.0261	TTYH3
-2.18	0.0019	0.043	FAM45A
-2.17	0.0001	0.0048	SLC9A3R1;
-2.17	0.0013	0.0336	CTSD
-2.16	4.34e-06	0.0004	BNIP3L
-2.16	0.0001	0.0052	LIMK1
-2.16	0.0007	0.021	RALGDS
-2.15	5.15e-06	0.0004	AGAP3
-2.15	8.64e-06	0.0006	RGS14
-2.14	4.63e-06	0.0004	ARL3
-2.14	0.0001	0.0061	HEATR5B
-2.14	0.0001	0.0061	ARHGAP9
-2.14	0.0013	0.033	RNFT1
-2.13	4.75e-06	0.0004	APBB1IP
-2.13	5.51e-05	0.0029	FAM117B
-2.13	0.0004	0.0138	TDP1
-2.13	0.0011	0.0283	STX10
-2.13	0.0015	0.0359	MID2
-2.13	0.0022	0.0484	ZNF10
-2.12	0.0011	0.0284	FAM134C
-2.11	4.13e-06	0.0004	PHF12
-2.11	0.0002	0.0079	STRBP;
-2.11	0.0002	0.0085	BCL9L
-2.11	0.0015	0.0366	CCDC64
-2.1	0.0012	0.0314	FAM159A
-2.08	3.08e-05	0.0018	SUN2
-2.08	0.0007	0.0212	RHOF
-2.07	0.0001	0.0048	ZNF831
-2.06	0.0003	0.0118	SPOCK2
-2.06	0.0004	0.0143	MXD1
-2.06	0.0014	0.0343	ZNF30
-2.06	0.0016	0.038	SMPD1
-2.05	7.92e-05	0.0039	FMNL1
-2.05	0.0001	0.0052	AKNA
-2.05	0.0002	0.0066	CD3G
-2.05	0.0003	0.0103	PIK3C2B
-2.05	0.0006	0.0193	IL21R
-2.05	0.0011	0.0292	CHD9
-2.04	0.0016	0.0386	MYO1F
-2.04	0.0018	0.0424	DIRC2
-2.03	7.23e-05	0.0036	CKLF;
-2.03	0.0002	0.0085	PLEKHA2
-2.02	3.56e-05	0.002	TSPYL4
-2.02	0.0002	0.0065	PPM1M
-2.02	0.0005	0.0163	NBPF20
-2.02	0.0012	0.0314	TSPAN14
-2.01	0.001	0.0267	ZBTB7B
-2.01	0.001	0.0268	CEP97
-2	4.34e-05	0.0023	RPS6KA1
-2	0.0006	0.0191	CTPS2
